# Supplementary material for: Exosomes secreted by nematode parasites transfer small RNAs to mammalian cells and modulate innate immunity
Source: PubMed Central journal article supplement (PMC4263141; doi:10.1038/ncomms6488), 2014-11-25
Supplement: ncomms6488-s1.pdf [file ncomms6488-s1.pdf]

# Supplementary Figure 1

a

## Location of GUUUCA motif relative to RNA position

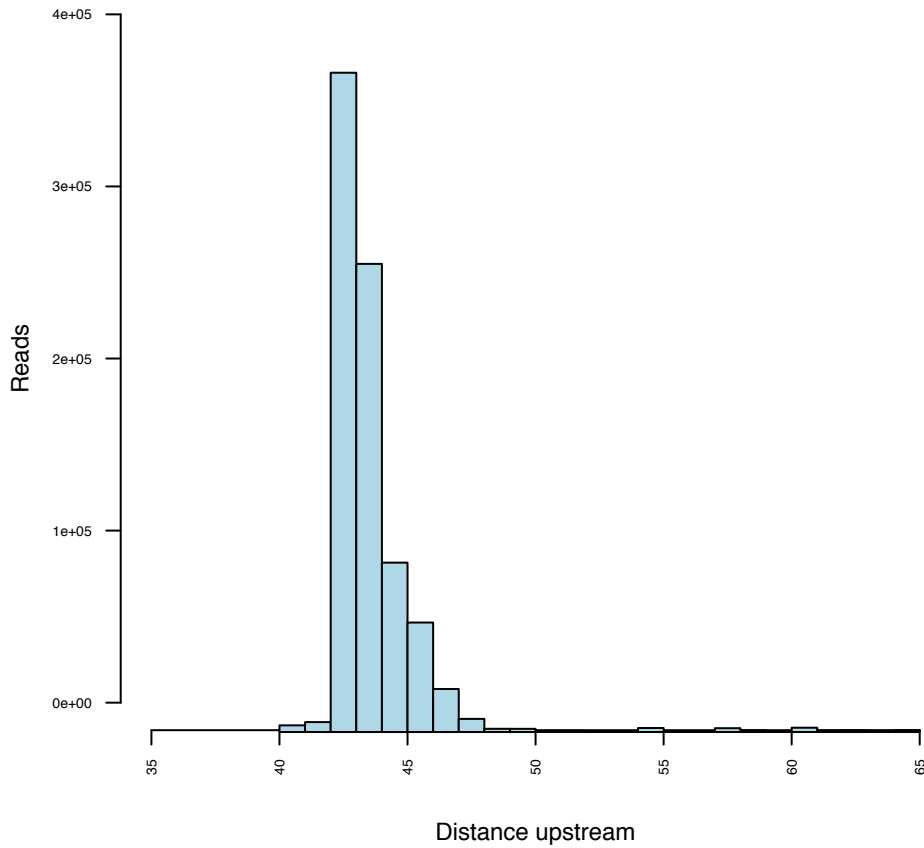

b

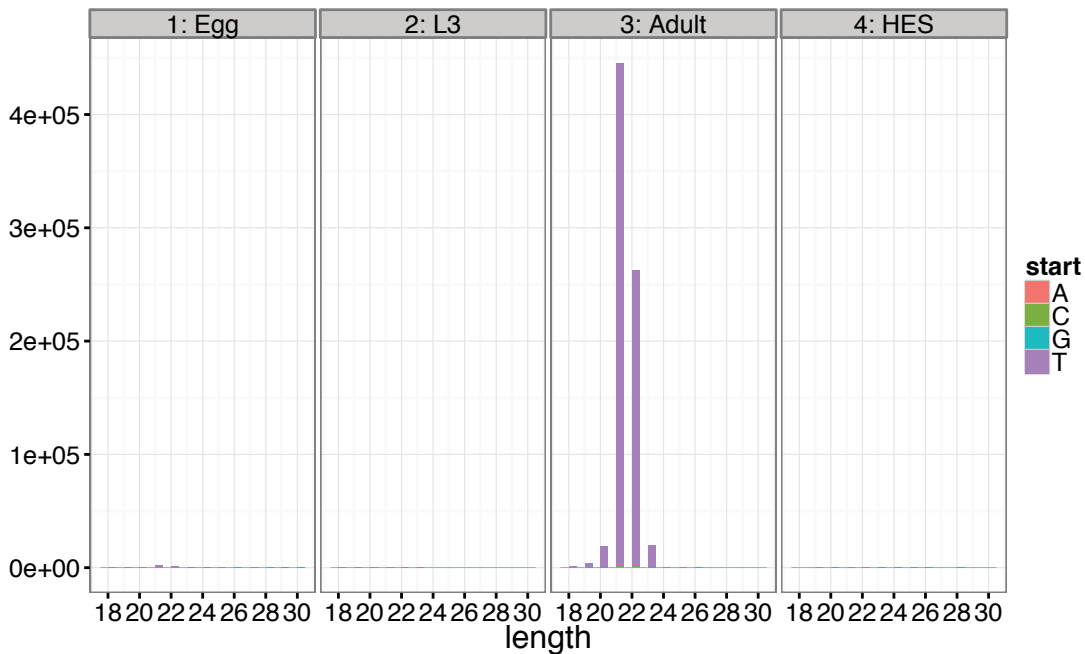

## Supplementary Figure 1: piRNAs identified in the adult *H. polygyrus* library

a, Distribution of "GUUUCA" motif locations upstream of the 5' RNA alignment site of sequences that were not identified as another class of small RNA (see Methods).

b, Start nucleotide frequency plots for RNA sequences with a "GUUUCA" motif 42-45 nucleotides upstream of the 5' alignment site.

## Supplementary Figure 2

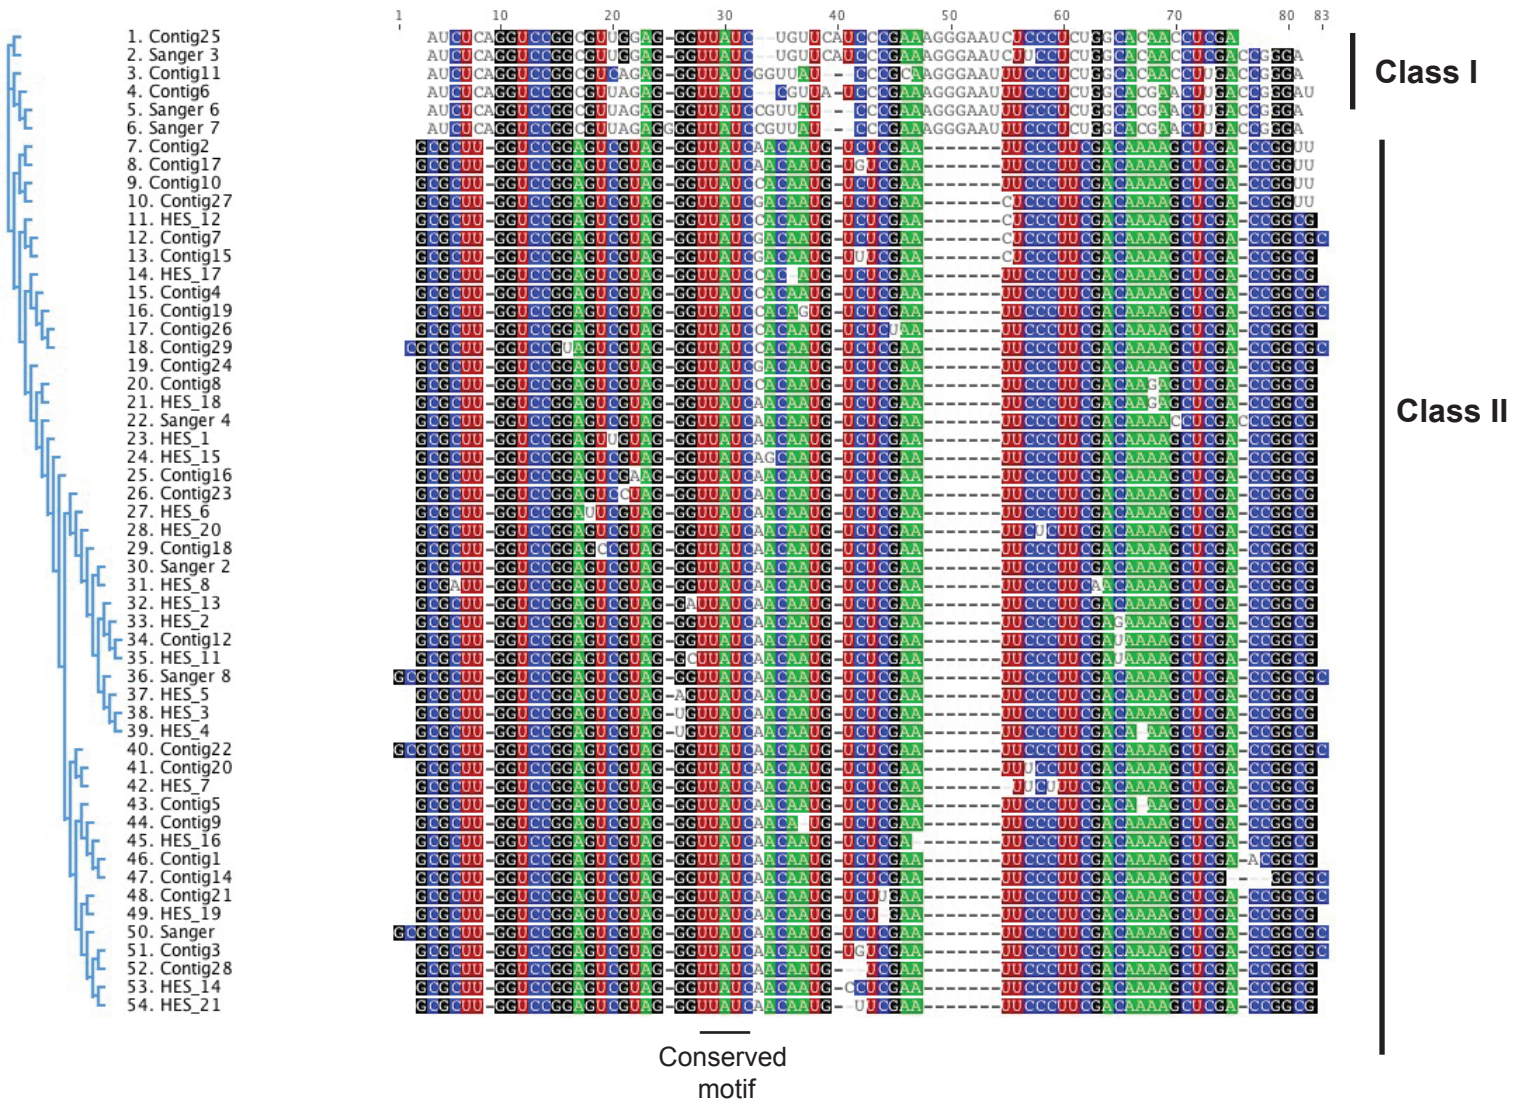

**Supplementary Figure 2: Full length nematode Y RNAs identified in the secretion product**  
 Sequence alignment of all Y RNAs identified in the total secretion library based on hairpin structure and “UUAUC motif” in the loop. Given the sequence heterogeneity of the adult worms and incomplete genome, it is not possible to infer whether sequence differences indicate distinct genes or polymorphisms.

### Supplementary Figure 3

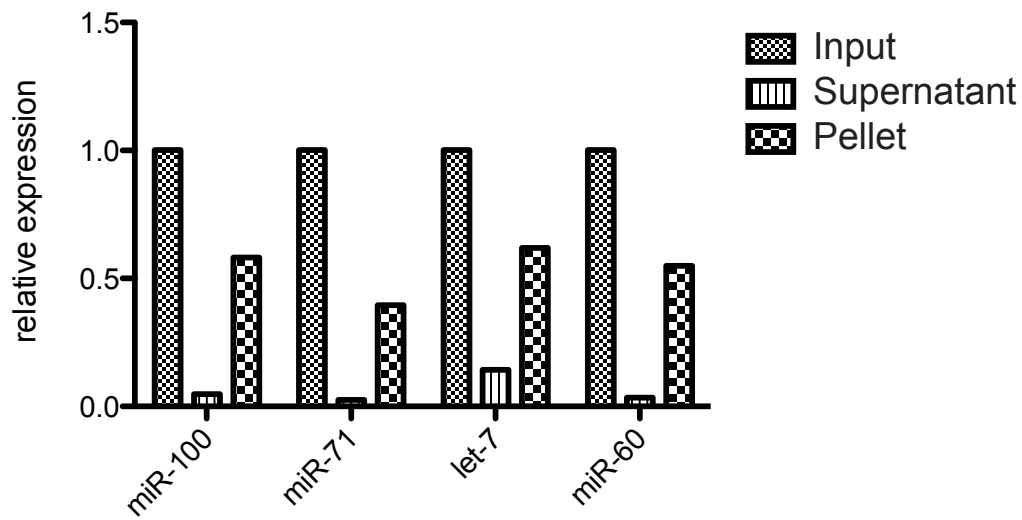

**Supplementary Figure 3: Parasite-derived miRNAs from the secretion product pellet upon ultracentrifugation** Relative expression is based on qRT-PCR analysis of total RNA extracted from secretion product prior to (“input”) and following ultracentrifugation (“supernatant” and “vesicle fraction”); values were normalized to input secretion products, based on equal volumes of starting material.

## Supplementary Figure 4

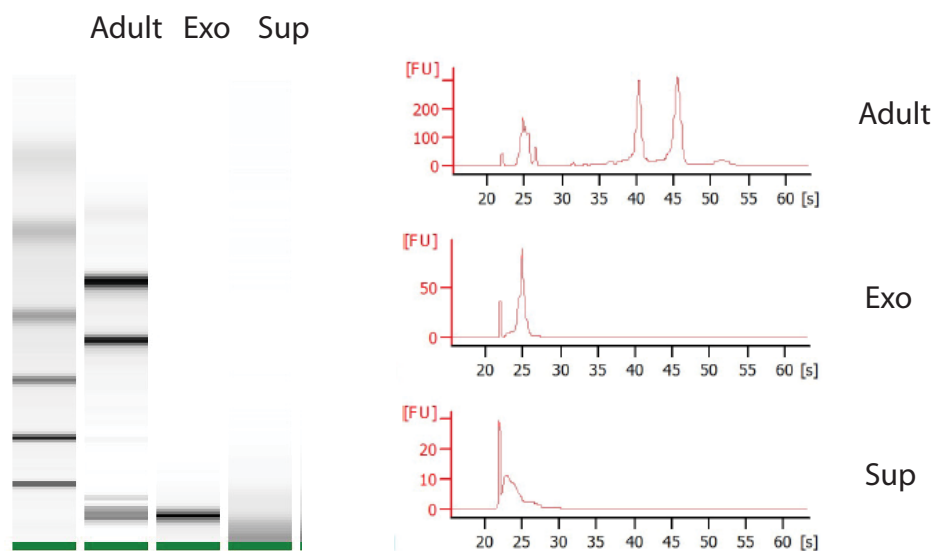

**Supplementary Figure 4: Bioanalyzer profile of total RNA extracted from adult *H. polygyrus* compared to vesicle and supernatant fractions of the secretion product.**

## Supplementary Figure 5

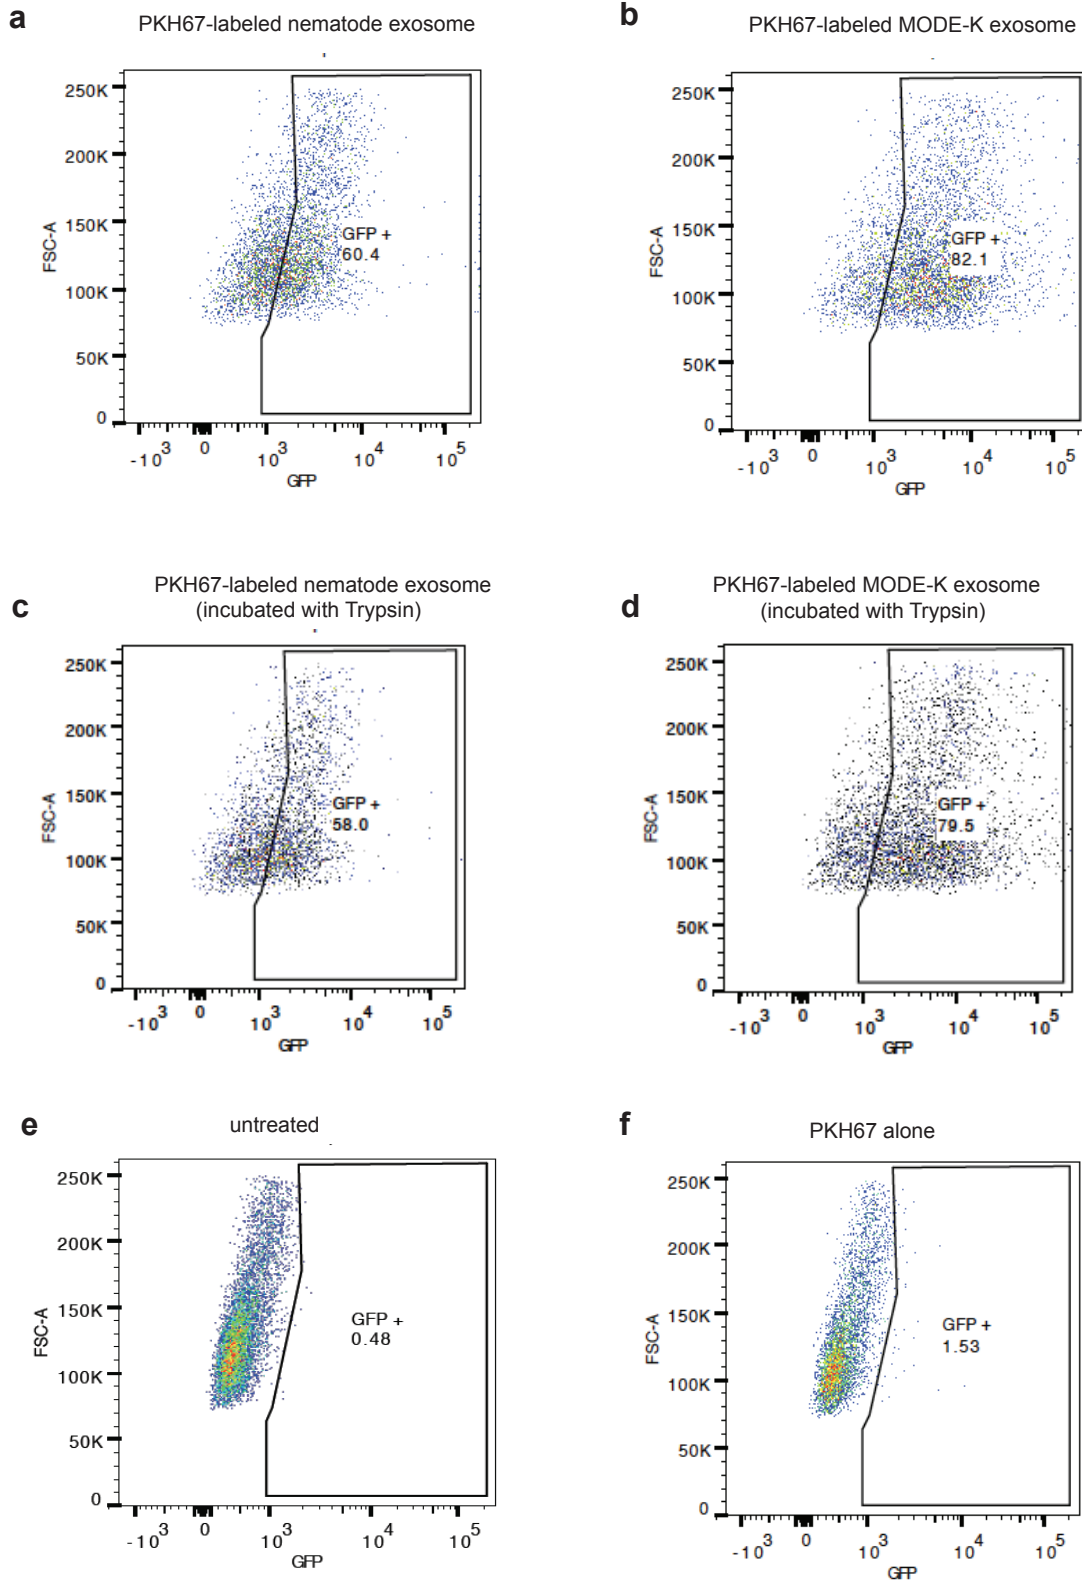

**Supplementary Figure 5: Uptake analysis by FACS of *H. polygyrus* exosomes or MODE-K exosomes into MODE-K cells** Cells ( $1 \times 10^5$ ) were incubated with 5  $\mu$ g (total protein) nematode (a) or MODE-K (b) exosomes that were pre-labeled with PKH67 and washed by ultracentrifugation; cells were either directly analyzed by FACS or first pre-incubated with Trypsin for 5 min prior to analysis (c,d) to eliminate signal due to non-specific association with the cell surface. The control cells were either untreated (e) or incubated with PKH67 prepared the same way in the absence of exosomes (f) to control for carry over.

## Supplementary Figure 6

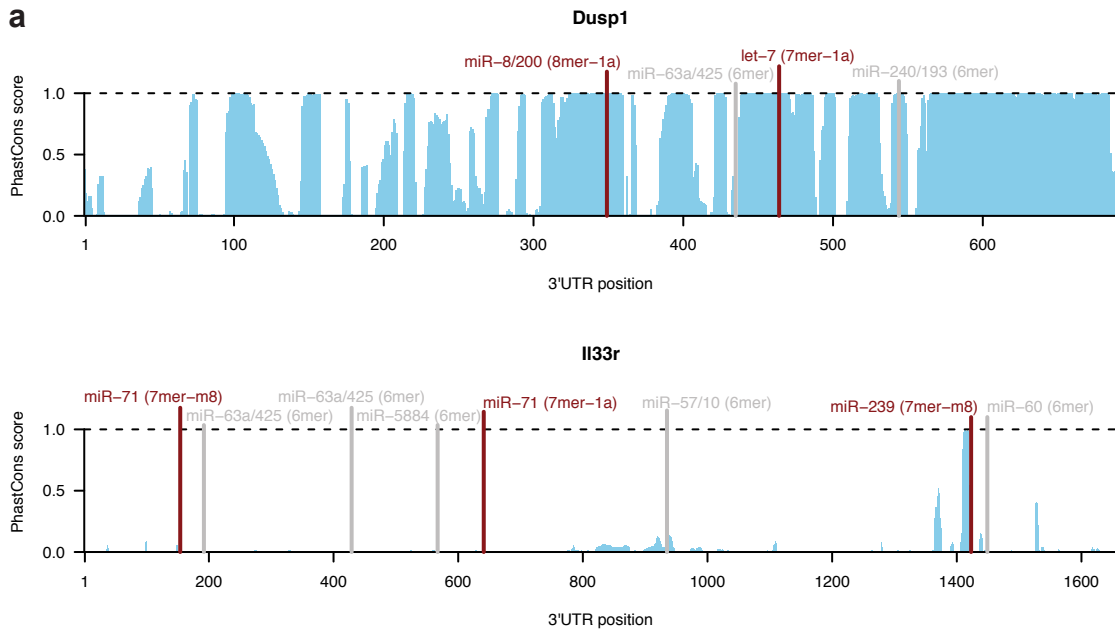

**b**

### miR-200 site

```

5'-UUGACACACCCACCAGUAUUA-3' nt 325 in 3'URT
      |||||
3'-GUAGUAAUGGACUGUCAUAAU-5' hpo-miR-236-3p/miR-200
  
```

### miR-425 site

```

5'-GCCUUCACAAAUGUCAUU-3' nt 421 in 3'URT
      |||||
3'-GGGAAGAGCGUCUUCACAGUAU-5' hpo-miR-236-3p/miR-200
  
```

### let-7 site 1

```

5'-UCAUAGAAGAACCAAAUACCUCAA-3' nt 444 in 3'UTR
      |||||
3'-AGUAUUGUAAAUUUGAUGGAGU-5' hpo-let-7
  
```

**Supplementary Figure 6: Conservation and miRNA binding sites of Dusp1 and Il33r 3'UTRs**  
**a**, Potential binding sites for *H. polygyrus* microRNAs were identified by searching for seed-matching sites. Genomic coordinates were used to extract PhastCons conservation scores from the 'phastCons60wayPlacental' table of the UCSC Genome Browser. Target types represent perfect seed-matches relative to 5' end of miRNA: 6mer = positions 2-7, 7mer-1a = 2-7 with 'A' across from position 1, 7mer-m8 = 2-8, 8mer-1a = 2-8 with 'A' across from 1. Positions of weak sites (6mers) are indicated in grey, stronger sites (7-8mer) in dark red. **b**, Potential target sites of parasite-derived miRNAs in mouse Dusp1 3'UTR.

**Supplementary Table 1: Most abundant nematode miRNAs identified in *H. polygyrus* secretion product libraries**

| Name                   | Mature sequence                  | Illumina V1.5  | TrueSeq           |                      |
|------------------------|----------------------------------|----------------|-------------------|----------------------|
|                        |                                  | Total HES RANK | HES vesicles RANK | HES supernatant RANK |
| miR-100a               | AACCCGUAGAUCGGAACUUGUGU          | 1              | 8                 | 8                    |
| miR-71                 | UGAAAGACAUGGGUAGUGAGAC           | 2              | 15                | 22                   |
| Bantam-a               | UGAGAUCaucACCAUAAGCACA           | 3              | 6                 | 12                   |
| Bantam-b               | UGAGAUCACGCGUAUAUUCGCC           | 4              | 3                 | 3                    |
| Bantam-c               | UGAGAUCAUUGUGAAGGCCACU           | 5              | 1                 | 2                    |
| miR-100b               | UACCCGUAAUGAUAAUGAUCCCGA         | 6              | 24                | 27                   |
| miR-100c               | UACCCGUAAUGUACAUAGCUUGAG         | 7              | 16                | 20                   |
| miR-83/29              | UAGCACCAUGUAAAUCAGCA             | 8              | 7                 | 15                   |
| miR-60                 | UAUUUAUGCACAUUUUCUGGUUCA         | 9              | 28                | 43                   |
| Bantam-d               | UGAGAUCACGCCUAUAUUCGCU           | 10             | 12                | 16                   |
| Bantam-e               | UGAGAUCACGCGUAUAUUCGC            | 11             | 14                | 32                   |
| Let-7a                 | UGAGGUAGUAGGUUGUAUAGUU           | 12             | 19                | 21                   |
| miR-63a/425            | UAUGACACUUCUGCGAGAAGGG           | 13             | 10                | 18                   |
| miR-79/9               | AUAAAGCUAGGUUACCAAAGCU           | 14             | 42                | 51                   |
| miR-239                | UUUGUACUCAGCAAAGAUGCUGC          | 15             | 36                | 46                   |
| miR-100d               | UACCCGU AUGAGUUUCCGCUGAG         | 16             | 35                | 45                   |
| miR-87                 | UUGAGCAACGAAUAUGUGCGGGA          | 17             | 65                | 69                   |
| Let-7b                 | UGAGGUAGUUUUAAAUGUUUGA           | 18             | 30                | 33                   |
| miR-77                 | UUCAUCAGGCCUCAGUCAUCCAC          | 19             | 26                | 41                   |
| miR-263/183            | AAUGGCACUGCAUGAAUUCACGG          | 20             | 21                | 25                   |
| <b>miR-240/miR-193</b> | <b>UACUGGCCUCGUAACUUCUAGC</b>    | <b>24</b>      | <b>2</b>          | <b>5</b>             |
| <b>miR-57/miR-10</b>   | <b>UACCCUGUAGUACCGAAUAGUGUCU</b> | <b>39</b>      | <b>4</b>          | <b>7</b>             |
| <b>miR-8/200</b>       | <b>UAUACUGUCAGGUAAUGAUGCU</b>    | <b>33</b>      | <b>5</b>          | <b>11</b>            |
| miR-100g               | UACCCGUAGCAUCUGUAUGUCU           | 47             | 9                 | 1                    |
| miR-239                | GACGAAUUCGUCUGGGAUUGGC           | 26             | 11                | 19                   |
| miR-63b/miR-425        | UAUGACACUGUUGCGAACUGGGAU         | 27             | 13                | 13                   |
| lin-4/miR-125          | UCCUGAGACCUCAAUUGCGA             | 22             | 17                | 23                   |
| miR-5884               | UAGGGUACUGACAUUGAAUGAGUU         | 44             | 18                | 17                   |
| miR-44a                | UGACUAGAGACACAUUCAGCU            | 45             | 20                | 6                    |
| miR-44b                | UGACUAGAUCCAUACUCAGCC            | 50             | 34                | 14                   |
| miR-44c                | UGACUAGACUGUUACUCGGCGU           | 42             | 38                | 10                   |

Relative ranking of miRNAs identified in 2 different library preparations: total HES, prepared by Illumina v1.5 kit (Fig. 1) or the vesicle and non-vesicle fractions (n=3 each), prepared by the TrueSeq kit. miRNAs noted in bold were identified at >10,000 rpm in the TrueSeq libraries but not the Illumina v1.5 libraries.

**Supplementary Table 2: Percentage of miRNA reads mapping to the listed miRNAs in vesicle libraries from 3 replicates**

| Name            | Rep 1 | Rep 2 | Rep 3 |
|-----------------|-------|-------|-------|
| Bantam-c        | 45.1% | 34.0% | 36.4% |
| Bantam-b        | 14.4% | 11.3% | 10.3% |
| miR-240/miR-193 | 8.0%  | 15.9% | 20.5% |
| miR-57/miR-10   | 5.6%  | 9.6%  | 7.8%  |
| miR-8/200       | 3.7%  | 3.7%  | 3.4%  |
| Bantam-a        | 3.0%  | 3.5%  | 3.1%  |
| miR-83/29       | 1.9%  | 2.0%  | 1.6%  |
| miR-100a        | 2.5%  | 1.4%  | 1.6%  |
| miR-100g        | 1.0%  | 2.4%  | 1.7%  |
| miR-63a/425     | 1.5%  | 1.8%  | 1.1%  |
| miR-239         | 1.5%  | 1.5%  | 1.5%  |
| Bantam-d        | 1.4%  | 1.6%  | 1.4%  |
| miR-63b/miR-425 | 0.7%  | 1.2%  | 1.2%  |
| Bantam-e        | 1.1%  | 0.6%  | 0.6%  |
| miR-100c        | 0.8%  | 0.5%  | 0.5%  |
| lin-4/miR-125   | 0.8%  | 0.5%  | 0.5%  |
| miR-71          | 0.5%  | 0.7%  | 0.8%  |
| miR-44a         | 0.4%  | 0.7%  | 0.3%  |
| let-7a          | 0.5%  | 0.6%  | 0.4%  |
| miR-263         | 0.5%  | 0.5%  | 0.4%  |
| miR-5884        | 0.2%  | 0.7%  | 0.8%  |

The percentages in each library are normalized to the total miRNA reads in that library

**Supplementary Table 3: Small RNA classification in serum of mice infected with *L.sigmodontis***

| Trimmed reads                     | 23,164,032 |
|-----------------------------------|------------|
| Mouse genome match                | 12,657,071 |
| Unambiguous                       | 12,655,769 |
| rRNA                              | 13,563     |
| tRNA                              | 11,342,328 |
| other rfam                        | 11,085     |
| miRNA                             | 1,273,839  |
| <i>L.sigmodontis</i> genome match | 2,490      |
| Unambiguous                       | 1,188      |
| rRNA                              | 131        |
| tRNA                              | 151        |
| other rfam                        | 18         |
| miRNA                             | 768        |

Unambiguous reads refer to those which only map to mouse or *L.sigmodontis* genomes (but not both).
